# Supplementary material
Source: Springer Nature journal article supplement (https://www.springermedizin.de/resource/supplementary/13058_2014_3394_MOESM1_ESM.pdf/9704066)

Adolescence

## Puberty

Ovarian estrogen production may trigger additional epigenetic changes

## Fetal period

Epigenetic reprogramming of cellular signals in:

F1: Somatic cells

F1: Germ cells →  
F2: Somatic cells &  
F2: Germ cells etc.

*Maternal exposure to DES during pregnancy*

Daughters

**2-fold increase in BREAST CANCER**

Granddaughters

Great granddaughters

Exposure to cancer initiating factors (carcinogens, radiation, etc)

## Adulthood

Epigenetic silencing of genes protecting against cancer and activation of genes promoting cancer

Increase in number of TEBS/TDLUs where breast cancer is initiated

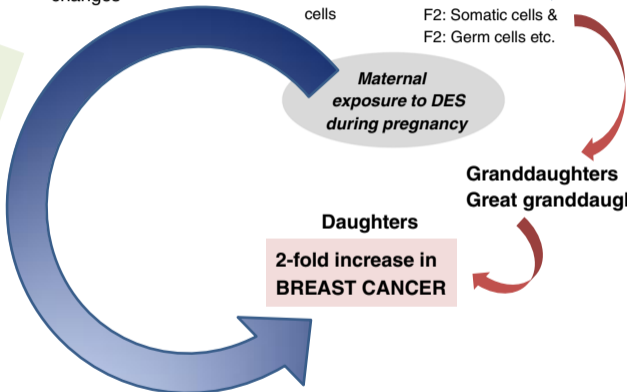

Supplement: MOESM1 [file 9704066]
